# Supplementary material for: The fate of fixed nitrogen in Santa Barbara Basin sediments during seasonal anoxia
Source: Copernicus journal article supplement (doi:10.5194/egusphere-2023-1498), 2023-07-11
Supplement: Supplementary file 1 [file egusphere-2023-1498-supplement.pdf]

Supplement of

## **The fate of fixed nitrogen in Santa Barbara Basin sediments during seasonal anoxia**

Xuefeng Peng<sup>1,2,3</sup>, David J. Yousavich<sup>4</sup>, Annie Bourbonnais<sup>1</sup>, Frank Wenzhoefer<sup>5,6,7</sup>, Felix Janßen<sup>5,6</sup>, Tina Treude<sup>4,8</sup> and David L. Valentine<sup>2,3</sup>

<sup>1</sup>School of Earth, Ocean and Environment, University of South Carolina, 701 Sumter Street, Columbia, SC, USA

<sup>2</sup>Marine Science Institute, University of California, Santa Barbara, CA, USA

<sup>3</sup>Department of Earth Science, 1006 Webb Hall, University of California, Santa Barbara, CA, USA

<sup>4</sup>Department of Earth, Planetary, and Space Sciences, University of California Los Angeles, 595 Charles E. Young Drive East, Los Angeles, CA, USA

<sup>5</sup>HGF-MPG Group for Deep-Sea Ecology and Technology, Alfred-Wegener-Institute, Helmholtz-Center for Polar and Marine Research, Am Handelshafen 12, Bremerhaven, Germany

<sup>6</sup>Max Planck Institute for Marine Microbiology, Celsiusstrasse 1, Bremen, Germany

<sup>7</sup>Department of Biology, DIAS, Nordcee and HADAL Centres, University of Southern Denmark, Odense M, Denmark

<sup>8</sup>Department of Atmospheric and Oceanic Sciences, University of California Los Angeles, Math Science Building, 520 Portola Plaza, Los Angeles, CA, USA.

## **Contents of this file**

Figures S1 to S3

Tables S1 to S4

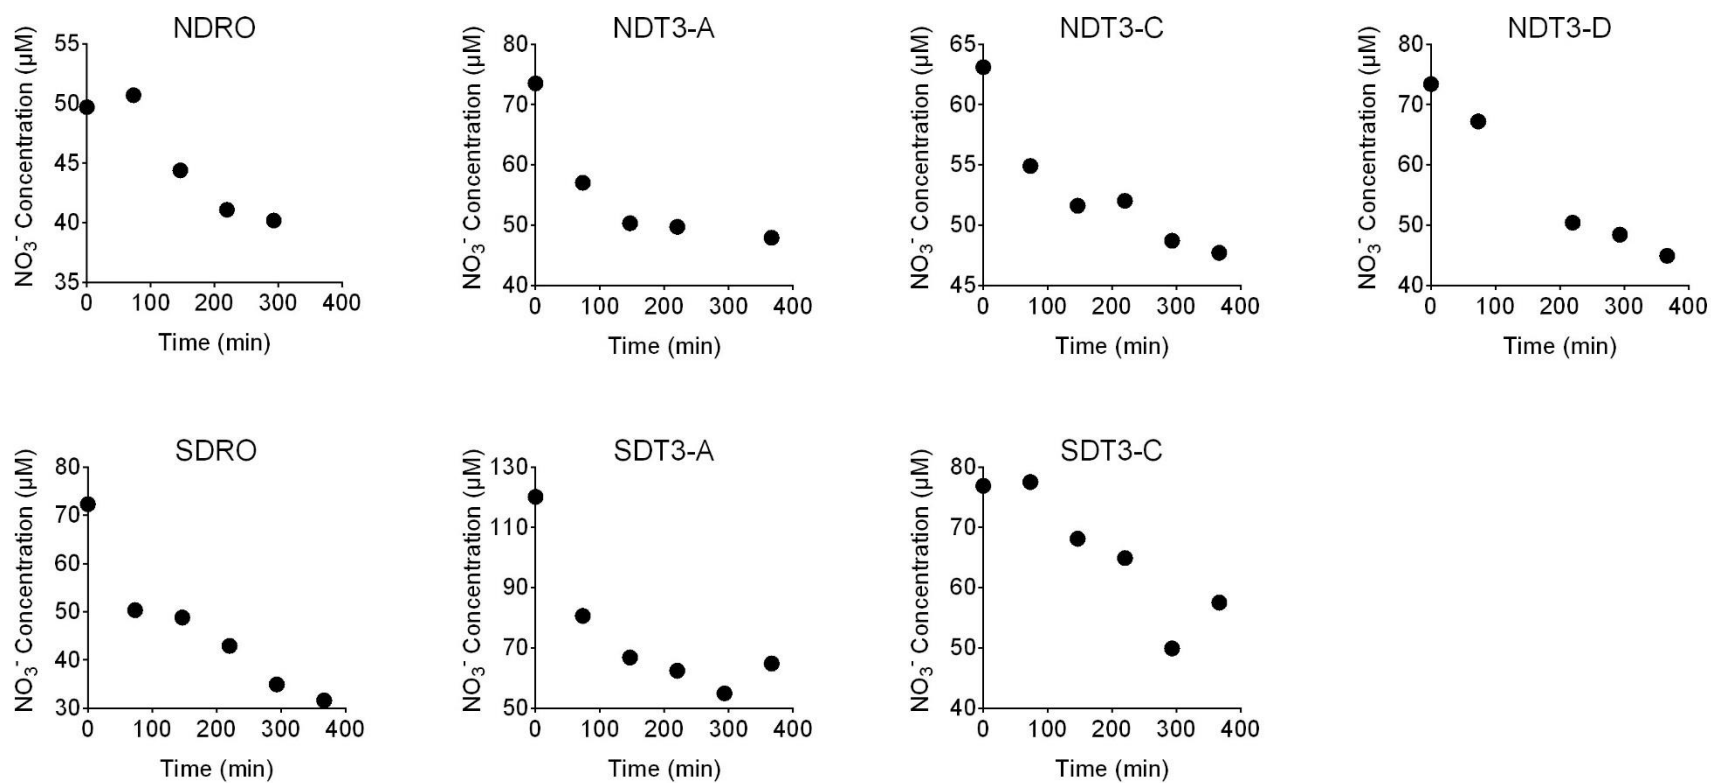

**Figure S1.** Nitrate ( $\text{NO}_3^-$ ) concentrations in benthic flux chambers with  $^{15}\text{NO}_3^-$  additions.

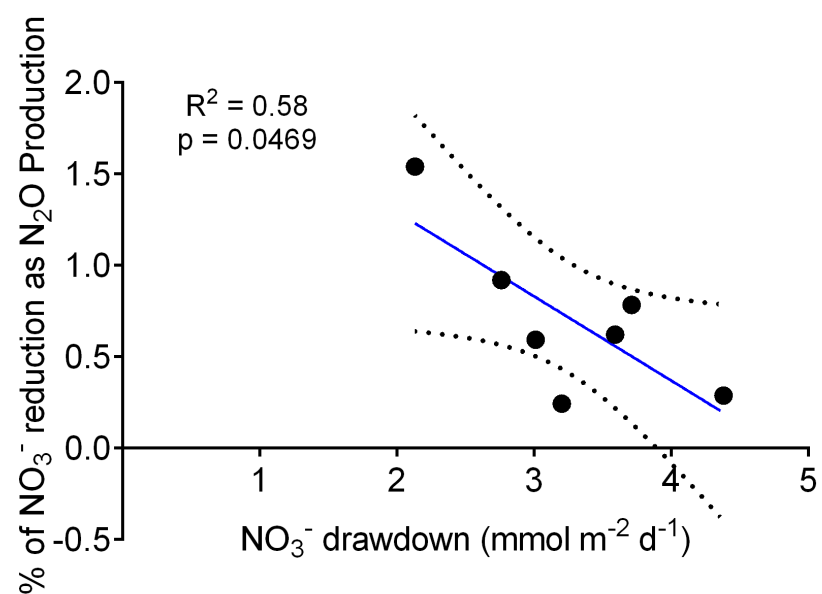

**Figure S2.** The correlation between  $\text{NO}_3^-$  drawdown rates measured from benthic flux chambers without  $^{15}\text{NO}_3^-$  additions and the fraction of  $\text{NO}_3^-$  reduction as  $\text{N}_2\text{O}$  production. The solid line represents the best fit linear regression, and the dashed lines represent the 95% confidence interval band.

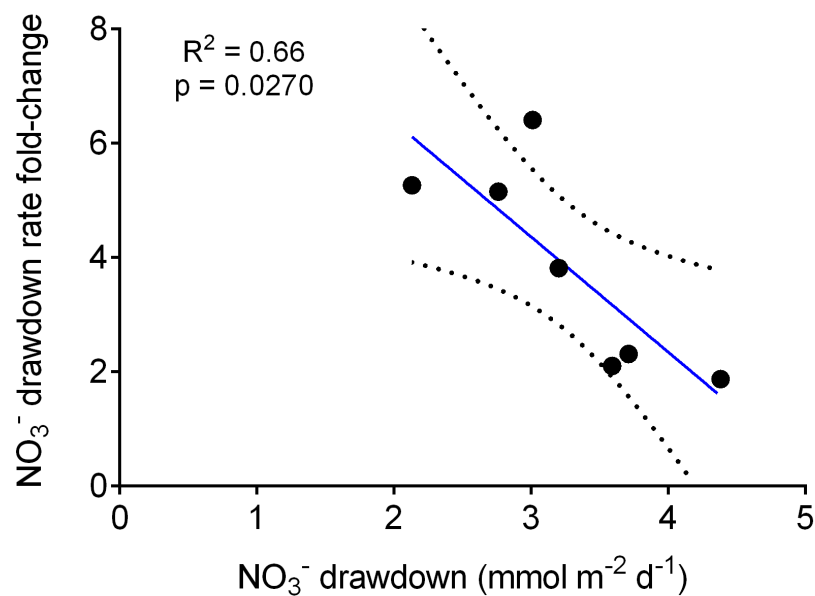

**Figure S3.** The correlation between  $\text{NO}_3^-$  drawdown rates measured from benthic flux chambers without  $^{15}\text{NO}_3^-$  additions and the  $\text{NO}_3^-$  drawdown rate fold-change as a result of  $^{15}\text{NO}_3^-$  additions (Table S2). The solid line represents the best fit linear regression, and the dashed lines represent the 95% confidence interval band.

**Table S1.** Detection limits of the rates of N<sub>2</sub> production from denitrification, N<sub>2</sub> production from anaerobic ammonia oxidation (anammox), NH<sub>4</sub><sup>+</sup> production from dissimilatory nitrate reduction to ammonia (DNRA), and N<sub>2</sub>O production.

| Station                                                                                            | NDT3-D | NDT3-C | NDT3-A | NDRO  | SDRO  | SDT3-A | SDT3-C |
|----------------------------------------------------------------------------------------------------|--------|--------|--------|-------|-------|--------|--------|
| N <sub>2</sub> production -<br>denitrification<br>(mmol m <sup>-2</sup> d <sup>-1</sup> )          | 0.053  | 0.174  | 0.092  | 0.156 | 0.200 | 0.042  | 0.051  |
| N <sub>2</sub> production -<br>anammox<br>(mmol m <sup>-2</sup> d <sup>-1</sup> )                  | 0.027  | 0.083  | 0.032  | 0.238 | 0.202 | 0.033  | 0.041  |
| NH <sub>4</sub> <sup>+</sup><br>production from<br>DNRA (mmol<br>m <sup>-2</sup> d <sup>-1</sup> ) | 0.006  | 0.022  | 0.026  | 0.018 | 0.071 | 0.010  | 0.029  |
| N <sub>2</sub> O production<br>(μmol m <sup>-2</sup> d <sup>-1</sup> )                             | 2.46   | 1.46   | 1.11   | 1.25  | 5.60  | 3.94   | 2.94   |

**Table S2.** The fold change in bottom water  $\text{NO}_3^-$  concentration as a result of  $^{15}\text{NO}_3^-$  addition; areal rates of  $\text{NO}_3^-$  drawdown with and without  $^{15}\text{NO}_3^-$  addition and the calculated fold change.

| Station                                                                                                           | NDT3-D | NDT3-C | NDT3-A | NDRO | SDRO | SDT3-A | SDT3-C |
|-------------------------------------------------------------------------------------------------------------------|--------|--------|--------|------|------|--------|--------|
| $\text{NO}_3^-$ fold change                                                                                       | 1.99   | 1.62   | 1.90   | 2.75 | 6.17 | 3.43   | 2.30   |
| $\text{NO}_3^-$ drawdown rate <u>without</u> $^{15}\text{NO}_3^-$ addition ( $\text{mmol m}^{-2} \text{d}^{-1}$ ) | 2.76   | 4.38   | 3.20   | 3.59 | 3.71 | 3.01   | 2.13   |
| $\text{NO}_3^-$ drawdown rate <u>with</u> $^{15}\text{NO}_3^-$ addition ( $\text{mmol m}^{-2} \text{d}^{-1}$ )    | 14.22  | 8.19   | 12.21  | 7.53 | 8.58 | 19.26  | 11.22  |
| $\text{NO}_3^-$ drawdown rate fold change                                                                         | 5.15   | 1.87   | 3.81   | 2.10 | 2.31 | 6.40   | 5.26   |

**Table S3.** The contribution to  $^{30}\text{N}_2$  production by anammox.

| Station          | NDT3-D | NDT3-C | NDT3-A | NDRO | SDRO | SDT3-A | SDT3-C |
|------------------|--------|--------|--------|------|------|--------|--------|
| Contribution (%) | 2.0%   | 1.9%   | 0.8%   | 1.5% | 1.4% | 0.9%   | 1.7%   |

**Table S4.** Bottom water nitrous oxide ( $\text{N}_2\text{O}$ ) concentration and saturation at the beginning ( $T_0$ ) of in-situ incubations. The saturation concentration of  $\text{N}_2\text{O}$  (12.16 nM) was calculated using the solubility equation from Weiss and Price (1980).

| Station                                 | NDT3-D | NDT3-C | NDT3-A | NDRO | SDRO | SDT3-A | SDT3-C |
|-----------------------------------------|--------|--------|--------|------|------|--------|--------|
| $\text{N}_2\text{O}$ concentration (nM) | 19.1   | 13.6   | 11.7   | 1.5  | 1.2  | 18.2   | 13.0   |
| $\text{N}_2\text{O}$ saturation         | 157%   | 112%   | 96%    | 12%  | 9%   | 150%   | 107%   |
